# Supplementary material for: Synthesis, dyeing performance and evaluation of the antimicrobial and antioxidant activities of azo dye derivatives incorporated with 1,3,4-thiadiazole combined within silicocomputational studies
Source: Royal Society of Chemistry journal article supplement (doi:10.1039/d3nj04790c), 2024-01-01
Supplement: d3nj04790c1.pdf [file d3nj04790c1.pdf]

## Supporting Information

### Synthesis, Dyeing performance and Evaluation of Antimicrobial and Antioxidant Activities of Azo Dye derivatives Incorporated 1,3,4-thiadiazole combined with *in-silico* computational studies

Kibrom Mezgebe<sup>1</sup>, Yadessa Melaku<sup>1</sup>, Venkatesha Perumal Ramachandran<sup>1</sup>, and, Endale Mulugeta<sup>1\*</sup>

<sup>1</sup>Department of Applied Chemistry, School of Applied Natural Science, Adama Science and Technology University, P.O.Box 1888, Adama, Ethiopia.

\* Correspondence: Endale Mulugeta (Phd) [endexindex05@gmail.com](mailto:endexindex05@gmail.com)

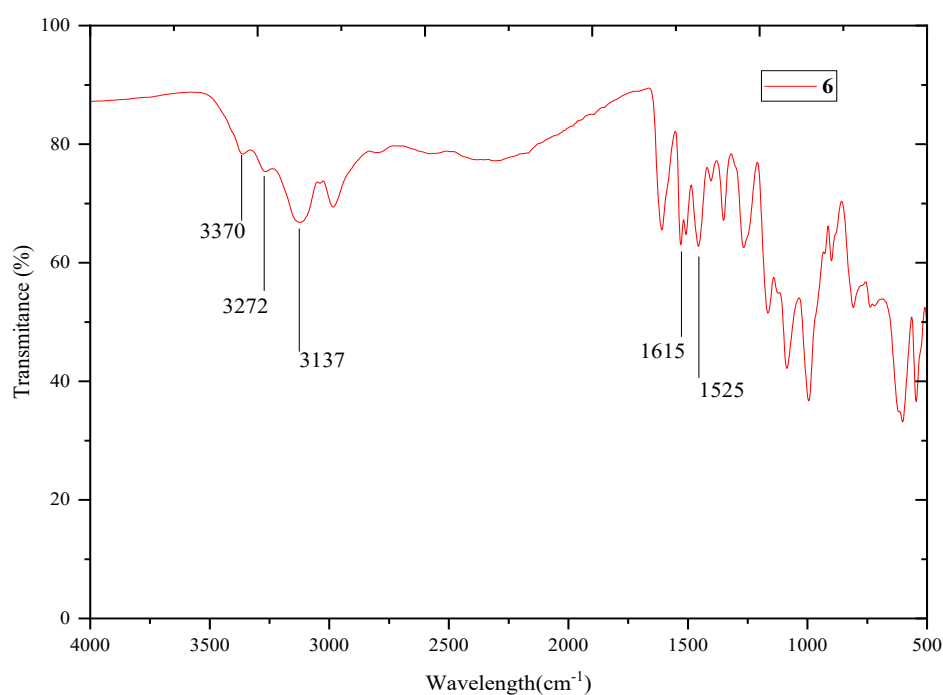

**Figure S1** : FTIR [(KBr)  $\nu_{\max}$ /cm<sup>-1</sup>] spectrum of compound **6**.

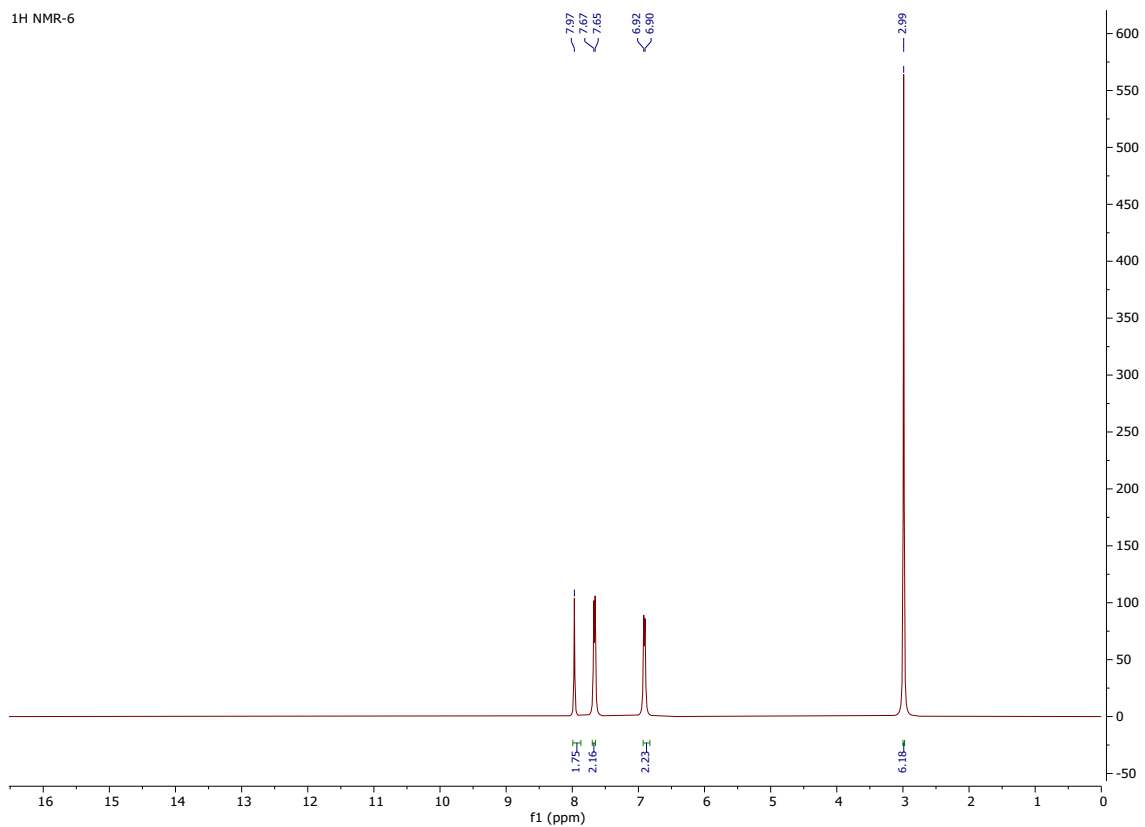

**Figure S2:** <sup>1</sup>H-NMR (400 MHz, DMSO-*d*<sub>6</sub>) spectrum of compound **6**.

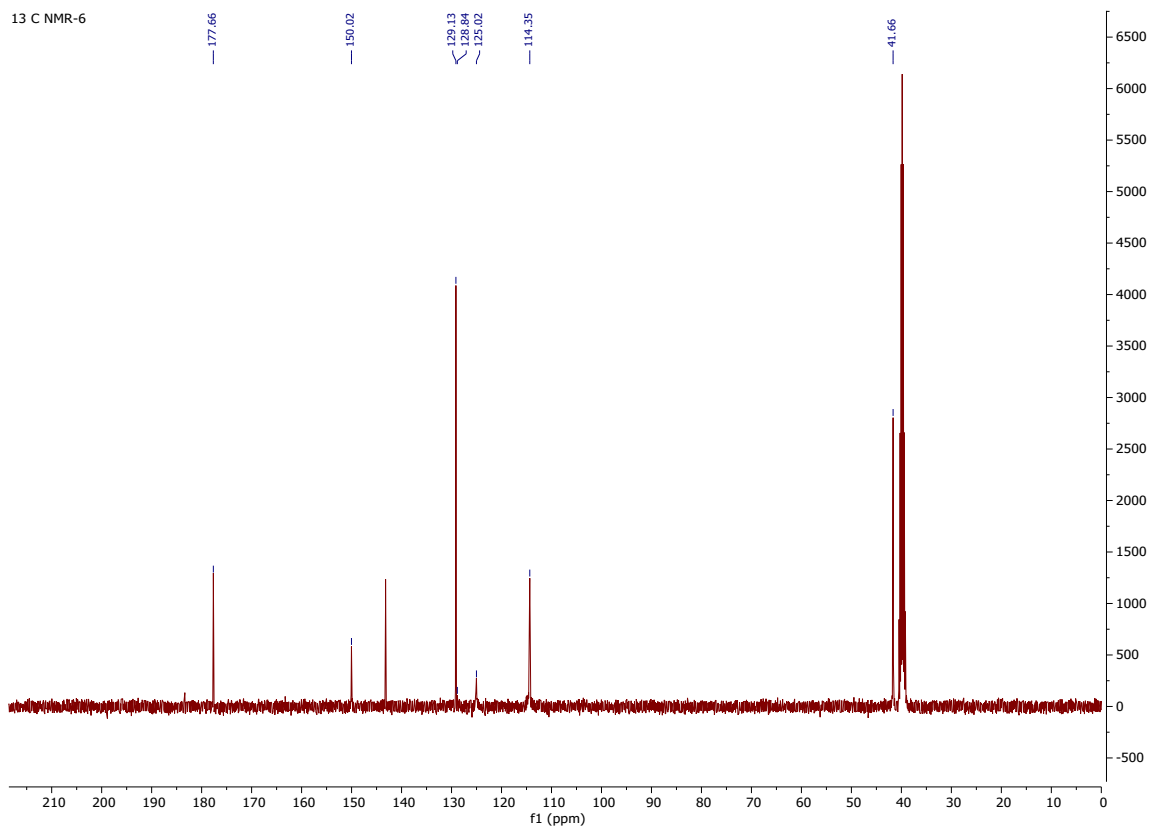

**Figure S3:** <sup>13</sup>C-NMR (100 MHz, DMSO-*d*<sub>6</sub>) spectrum of compound **6**.

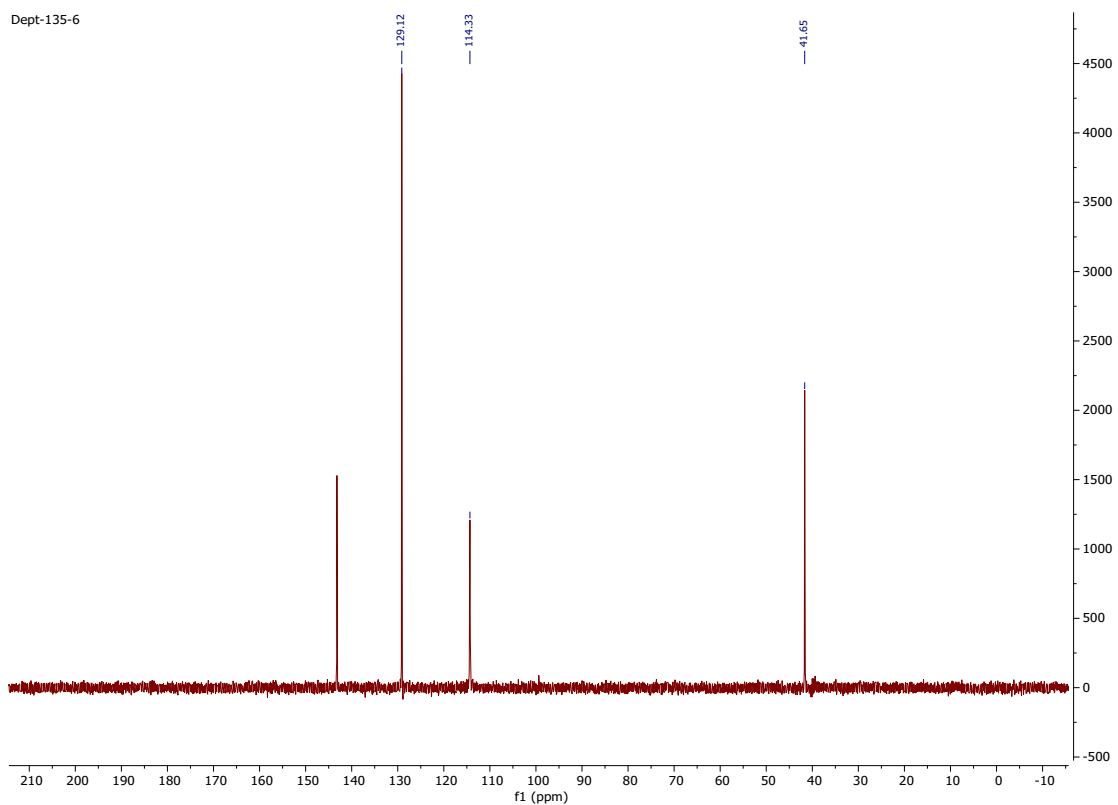

**Figure S4:** DEPT-135 (100 MHz, DMSO- $d_6$ ) spectrum of compound **6**.

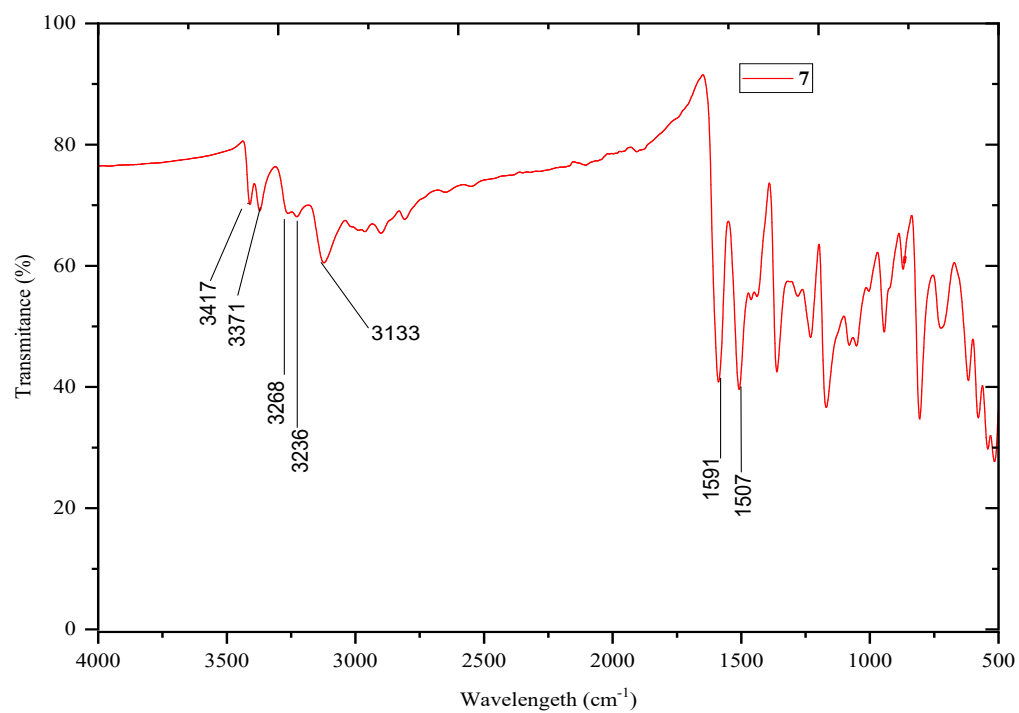

**Figure S5:** FTIR [(KBr)  $\nu_{\text{max}}/\text{cm}^{-1}$ ] spectrum of compound **7**.

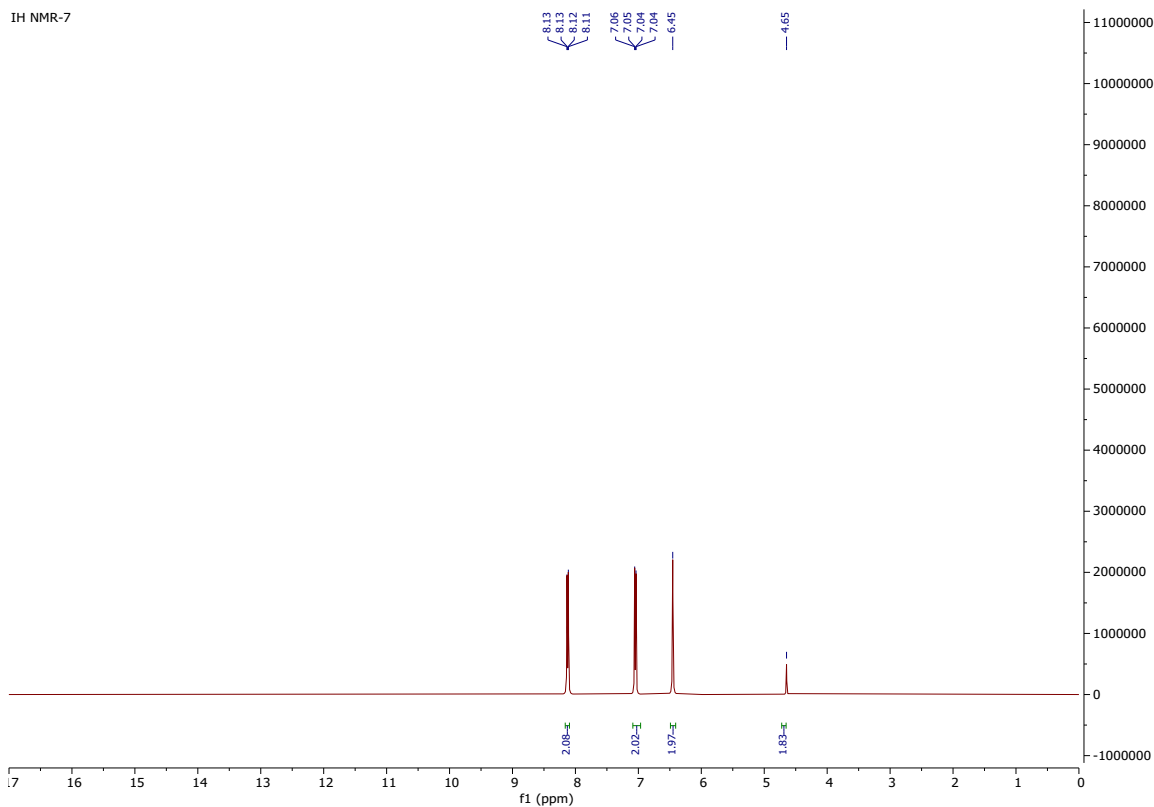

**Figure S6:**  $^1\text{H}$ -NMR (600 MHz,  $\text{DMSO-}d_6$ ) spectrum of compound 7.

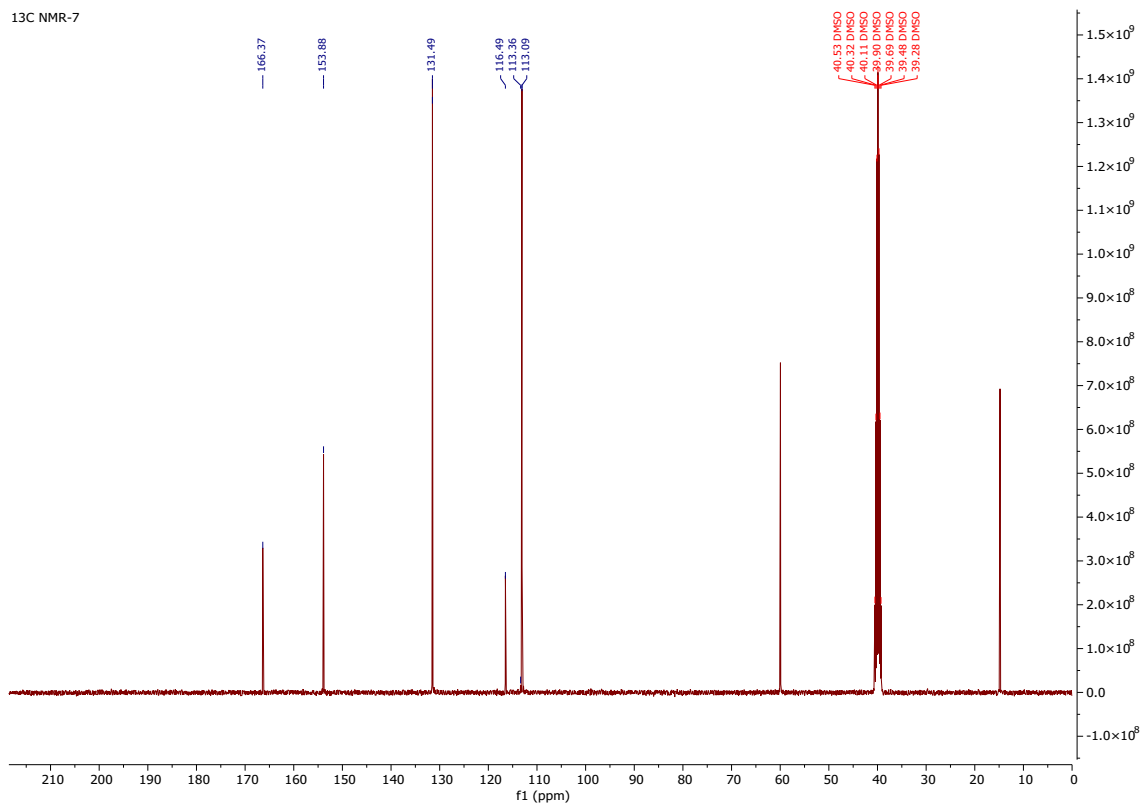

**Figure S7:**  $^{13}\text{C}$ -NMR (100 MHz,  $\text{DMSO-}d_6$ ) spectrum of compound 7.

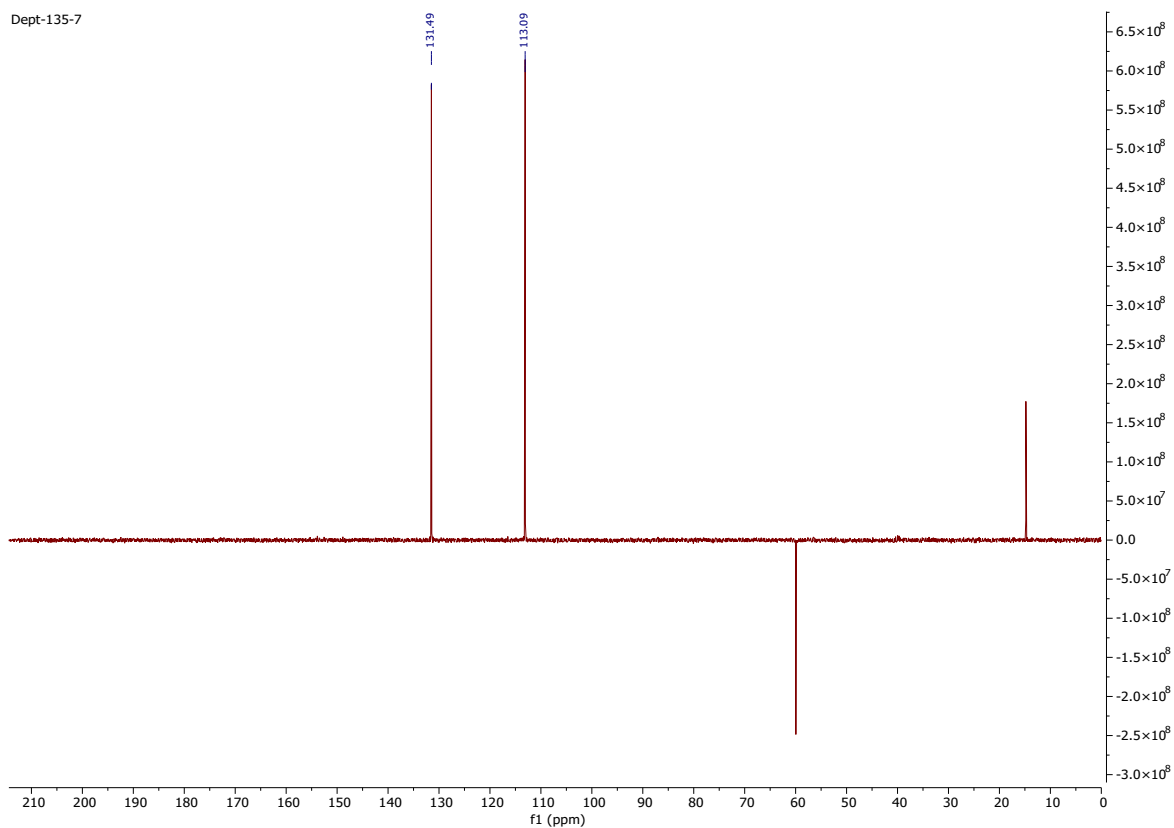

**Figure S8:** DEPT-135 (400 MHz, DMSO-*d*<sub>6</sub>) spectrum of compound **7**.

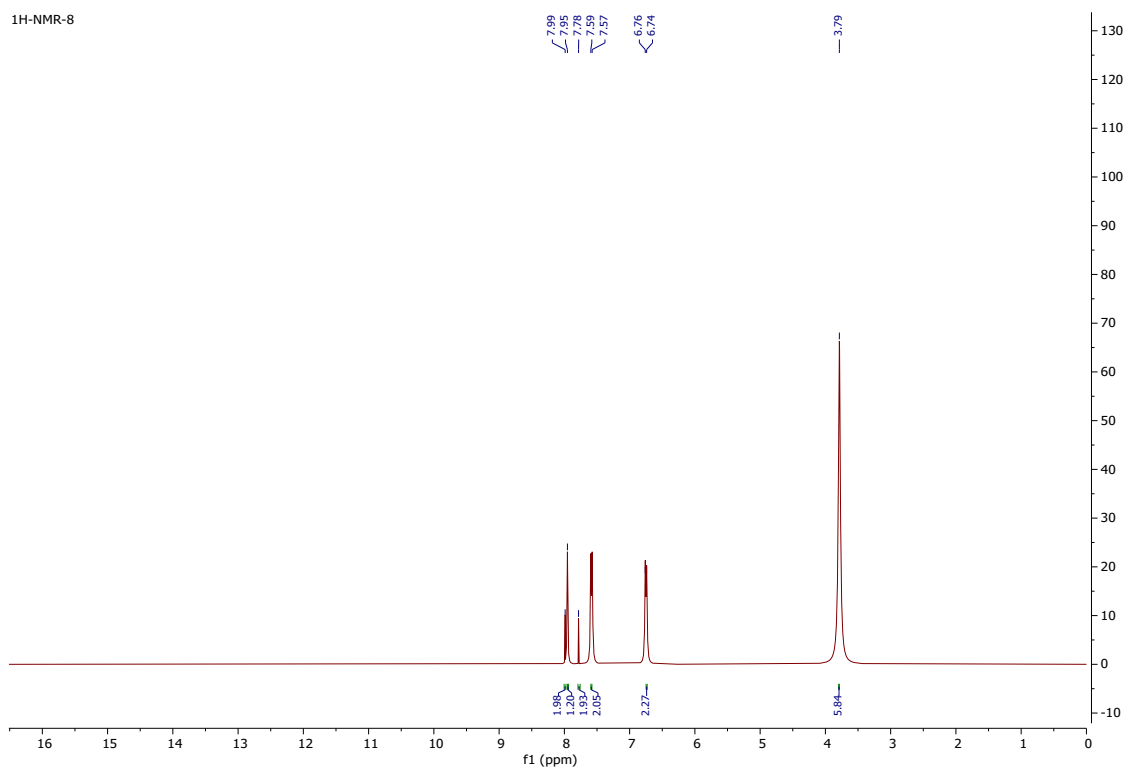

**Figure S9:** <sup>1</sup>H-NMR (400 MHz, DMSO-*d*<sub>6</sub>) spectrum of compound **8**.

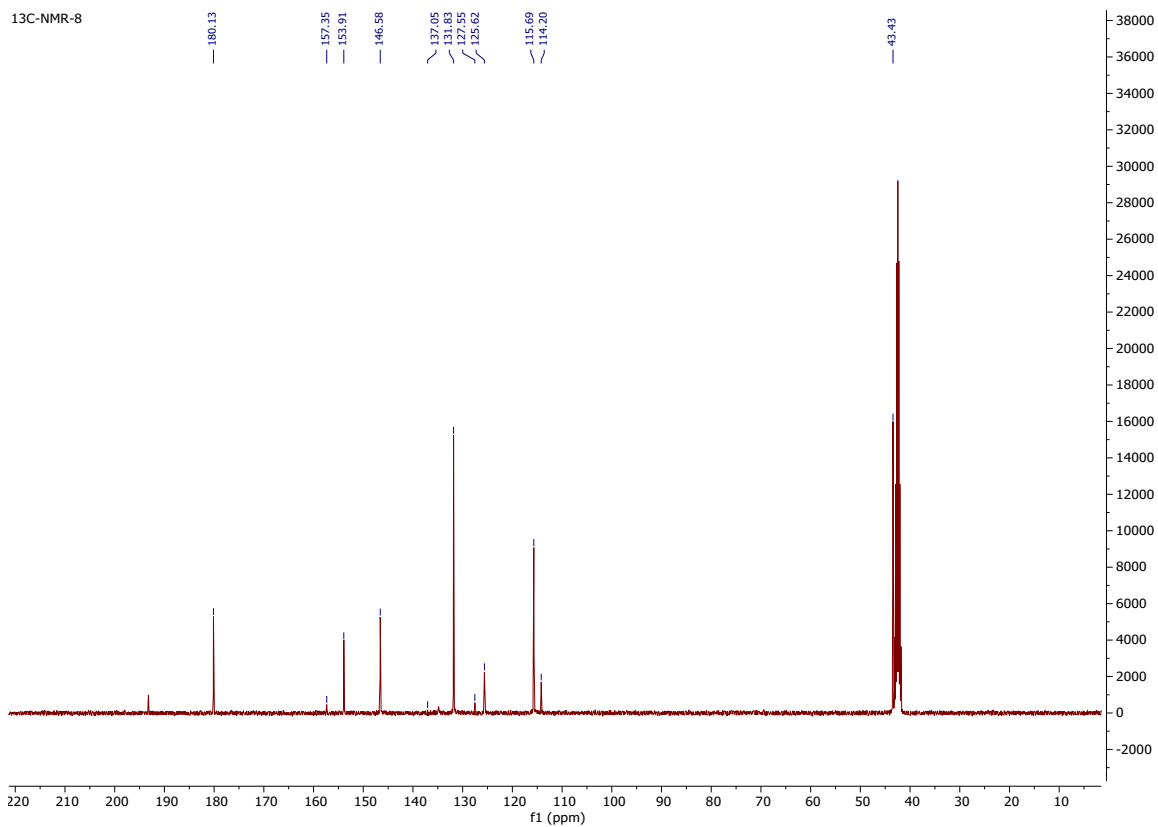

**Figure S10:**  $^{13}\text{C}$ -NMR (100 MHz,  $\text{DMSO-}d_6$ ) spectrum of compound **8**.

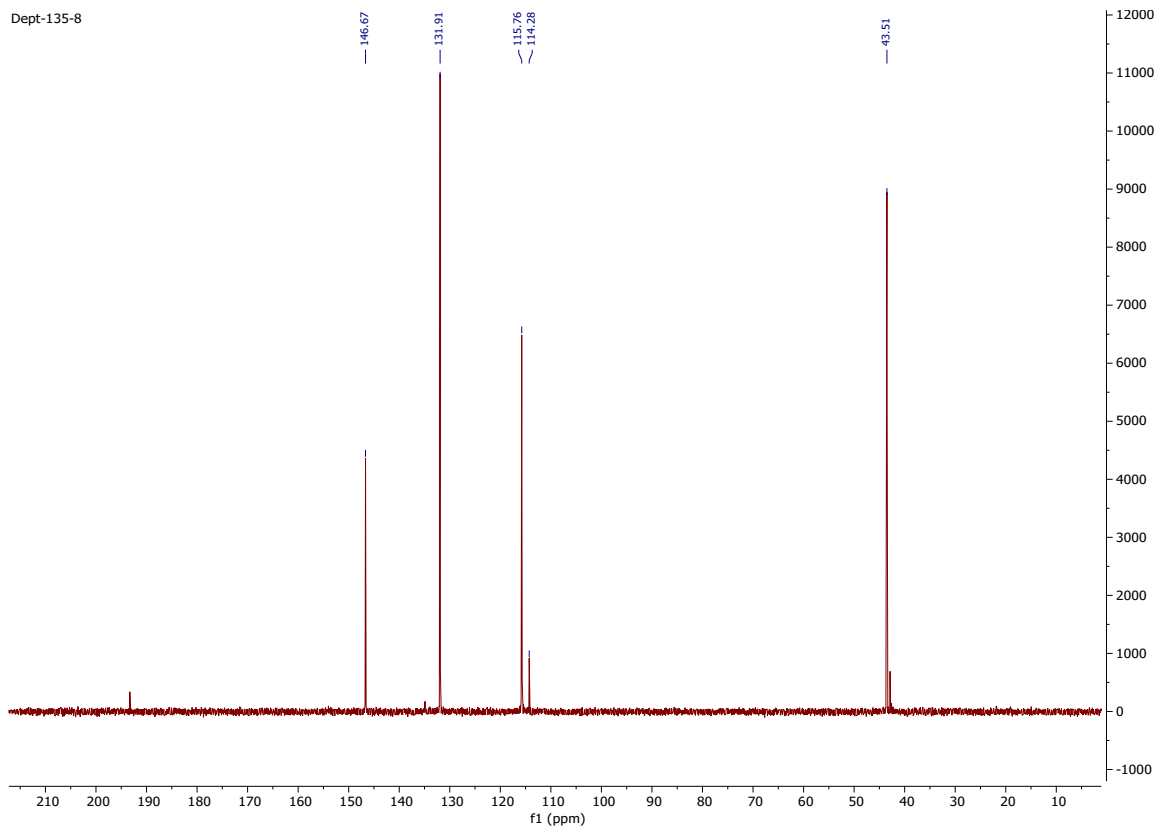

**Figure S11:** DEPT-135 (100 MHz,  $\text{DMSO-}d_6$ ) spectrum of compound **8**.

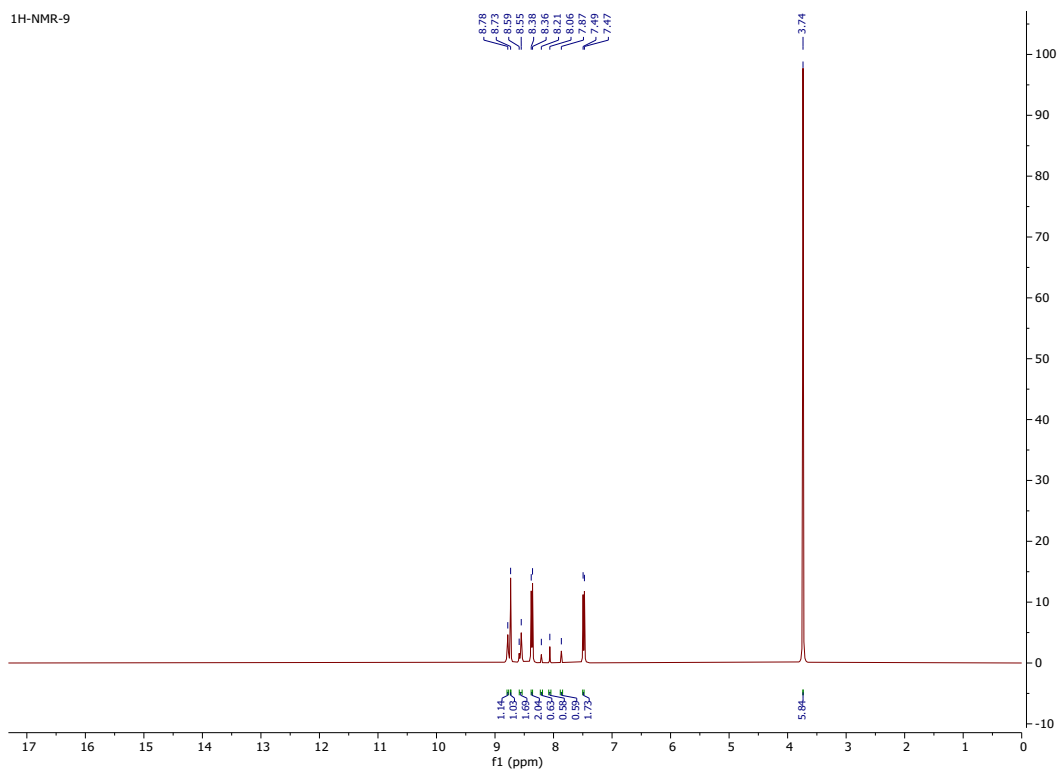

**Figure S12:**  $^1\text{H}$ -NMR (400 MHz,  $\text{DMSO-}d_6$ ) spectrum of compound **9**

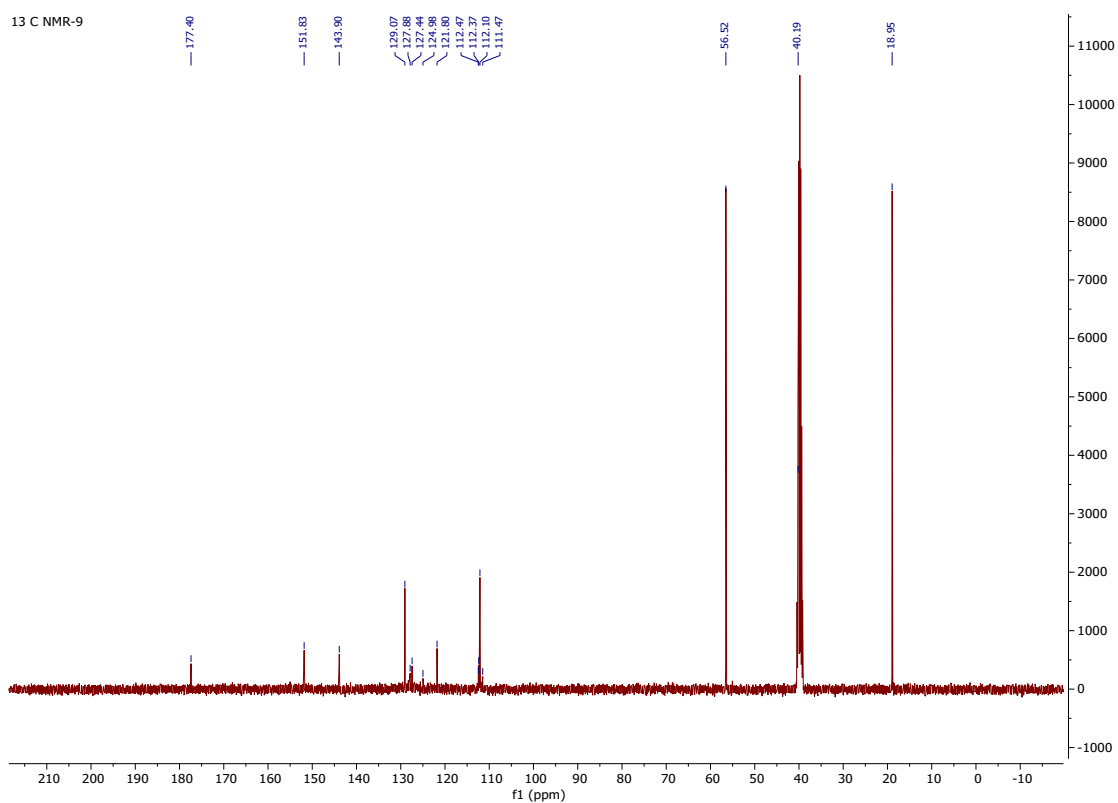

**Figure S13:**  $^{13}\text{C}$ -NMR (100 MHz,  $\text{DMSO-}d_6$ ) spectrum of compound **9**.

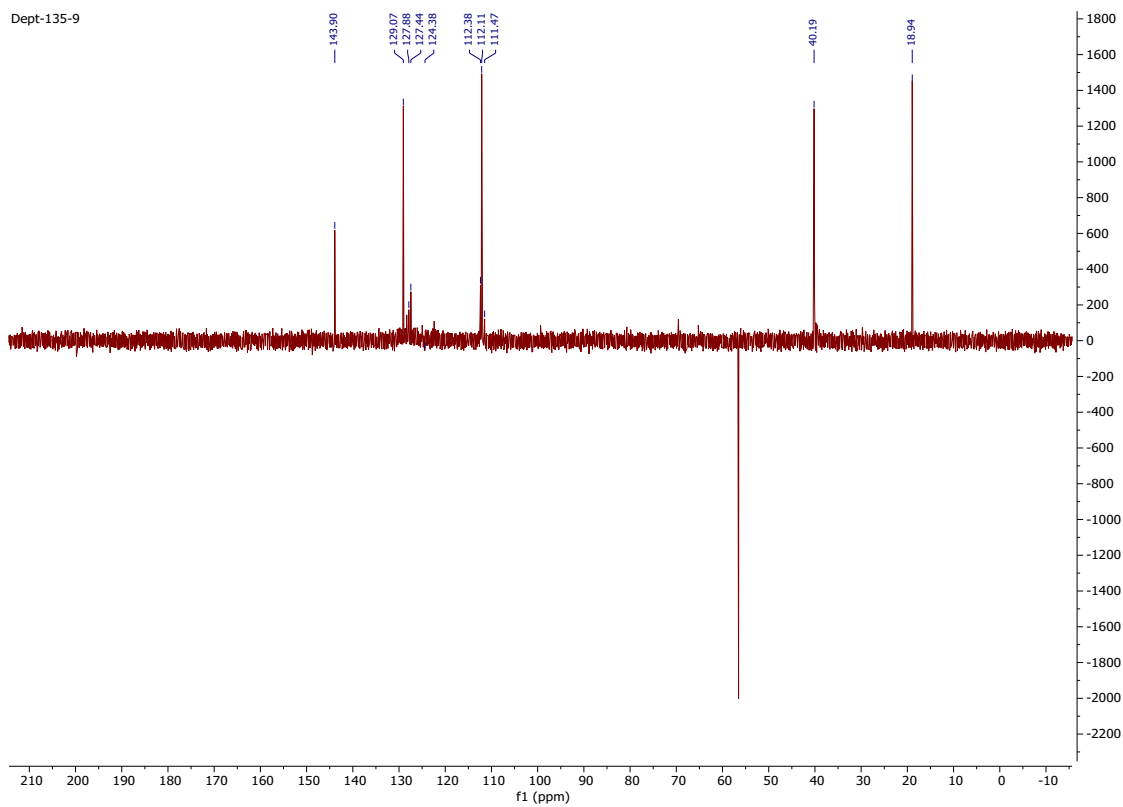

**Figure S14:** Dept-135 (100 MHz, DMSO- $d_6$ ) spectrum of compound **9**.

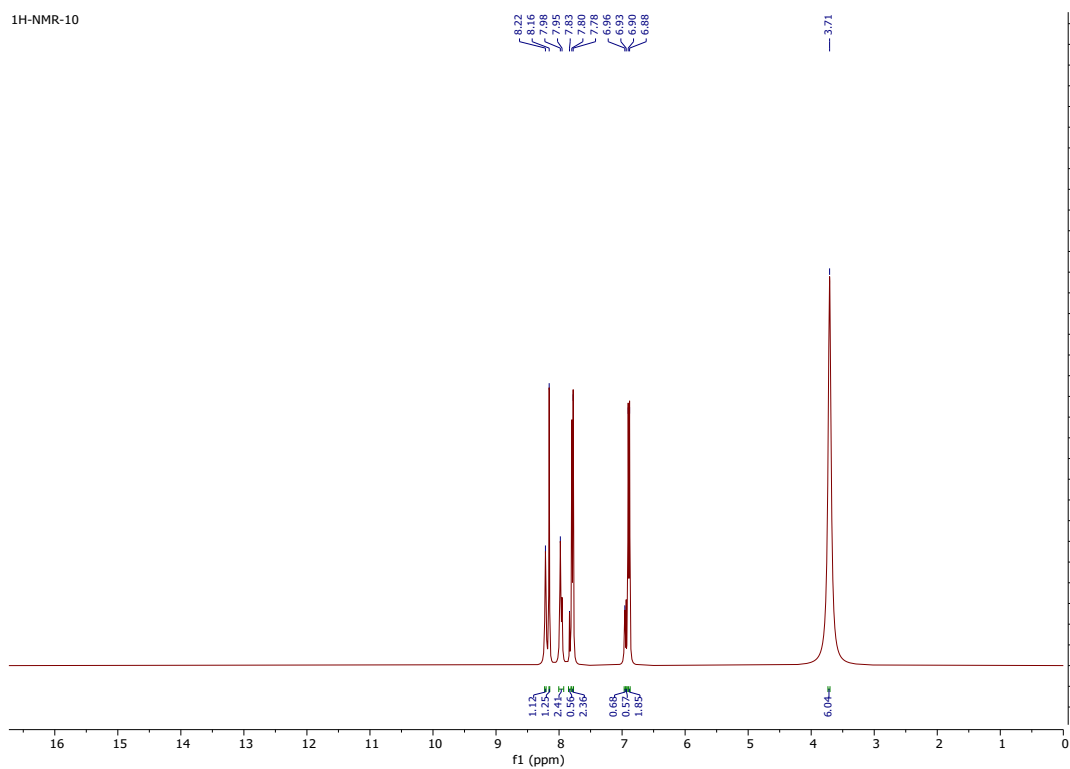

**Figure S15:**  $^1\text{H-NMR}$  (400 MHz, DMSO- $d_6$ ) spectrum of compound **10**.



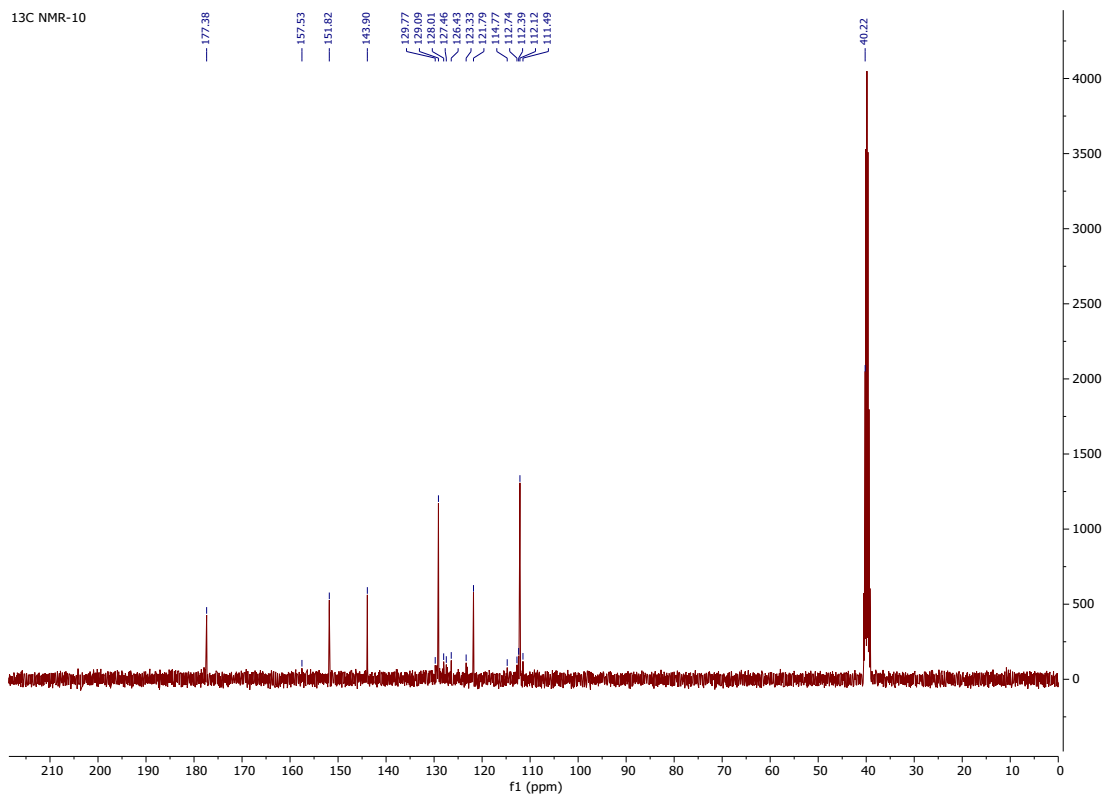

**Figure S16:**  $^{13}\text{C}$  NMR (100 MHz,  $\text{DMSO-}d_6$ ) spectrum of compound **10**.

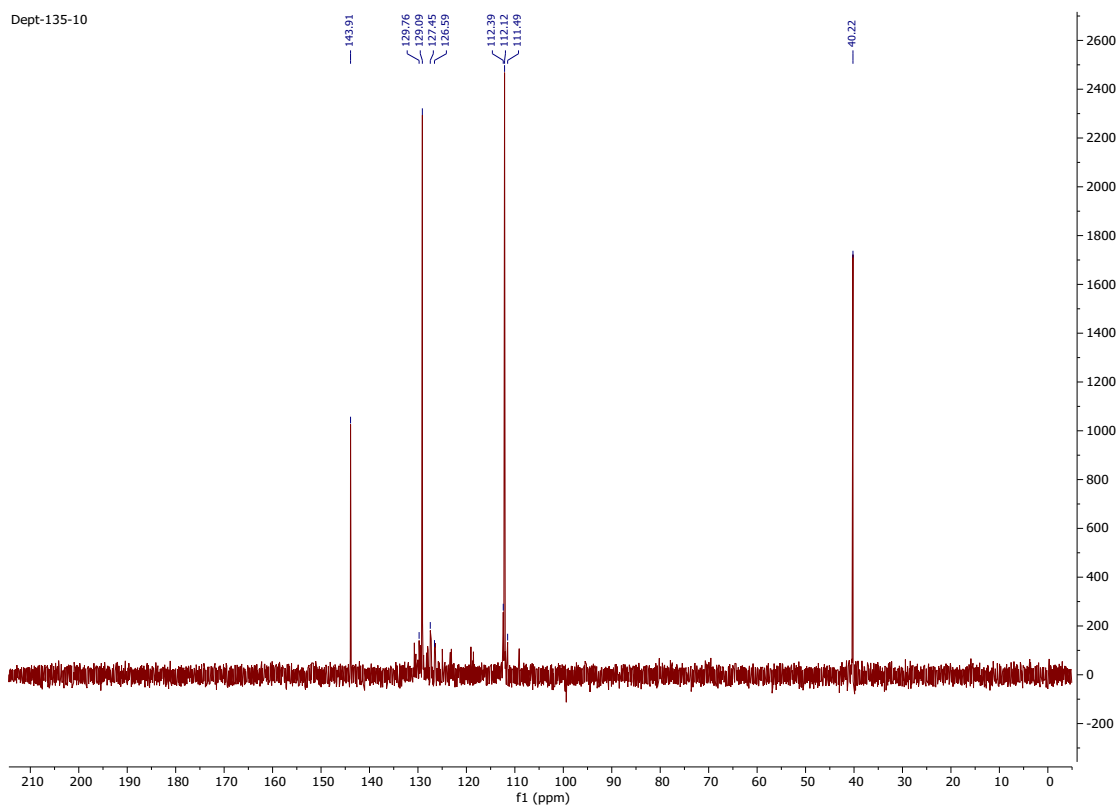

**Figure S17:** Dept-135 (100 MHz,  $\text{DMSO-}d_6$ ) spectrum of compound **10**.

1H-NMR-11

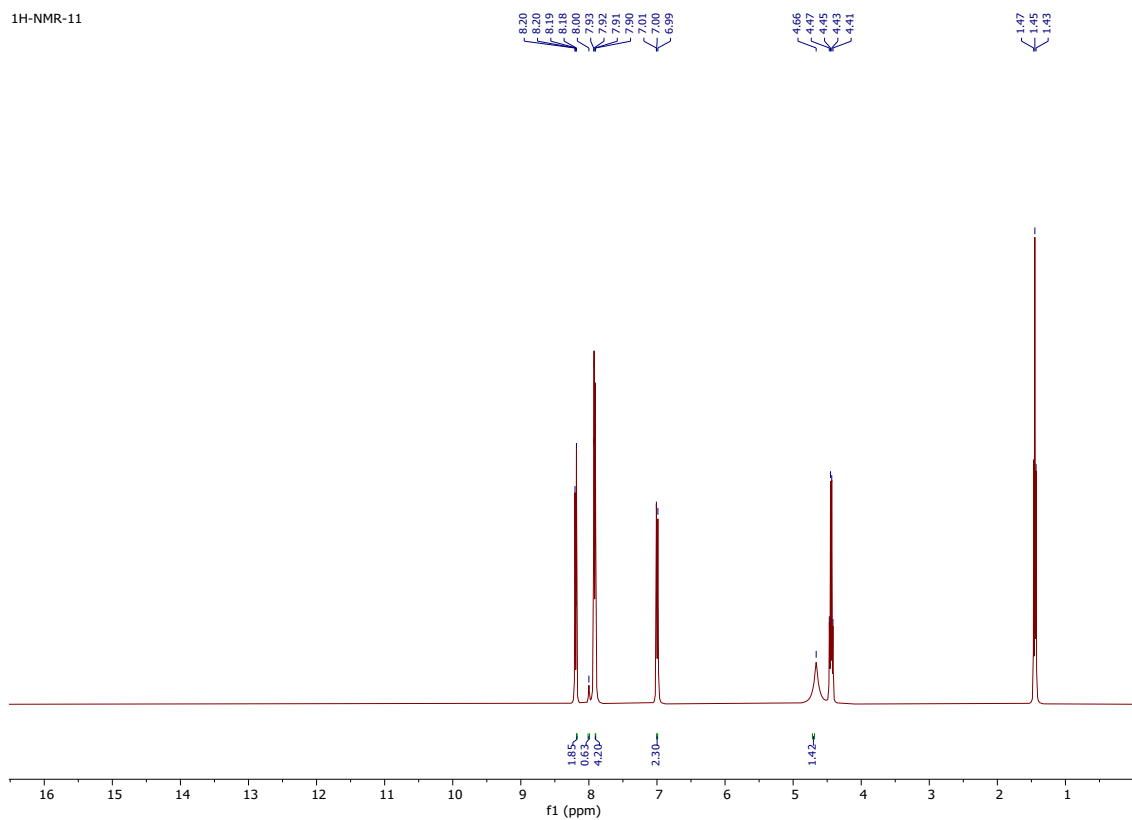

**Figure S18:**  $^1\text{H-NMR}$  ( $\text{CDCl}_3$ , 400 MHz) spectrum of compound **11**.

$^{13}\text{C-NMR-11}$

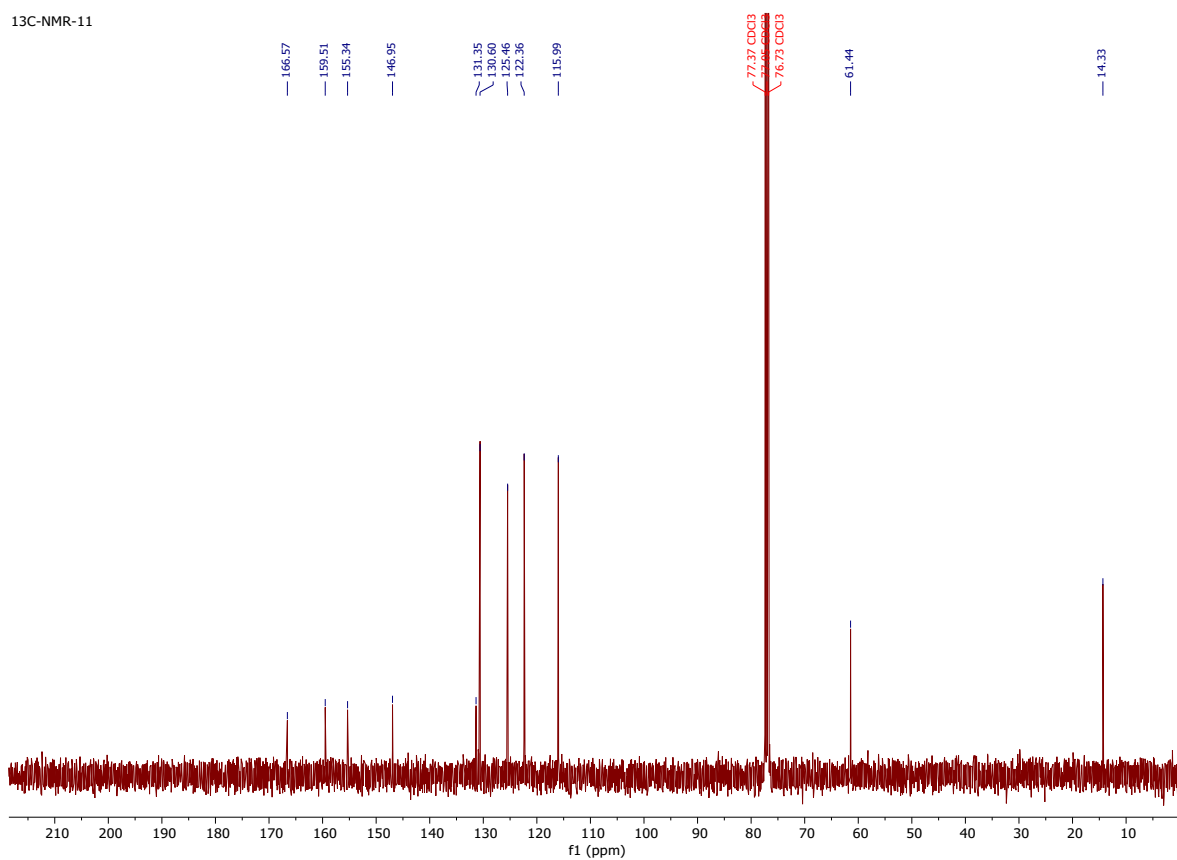

**Figure S19:**  $^{13}\text{C-NMR}$  ( $\text{CDCl}_3$ , 101 MHz) spectrum of compound **11**.

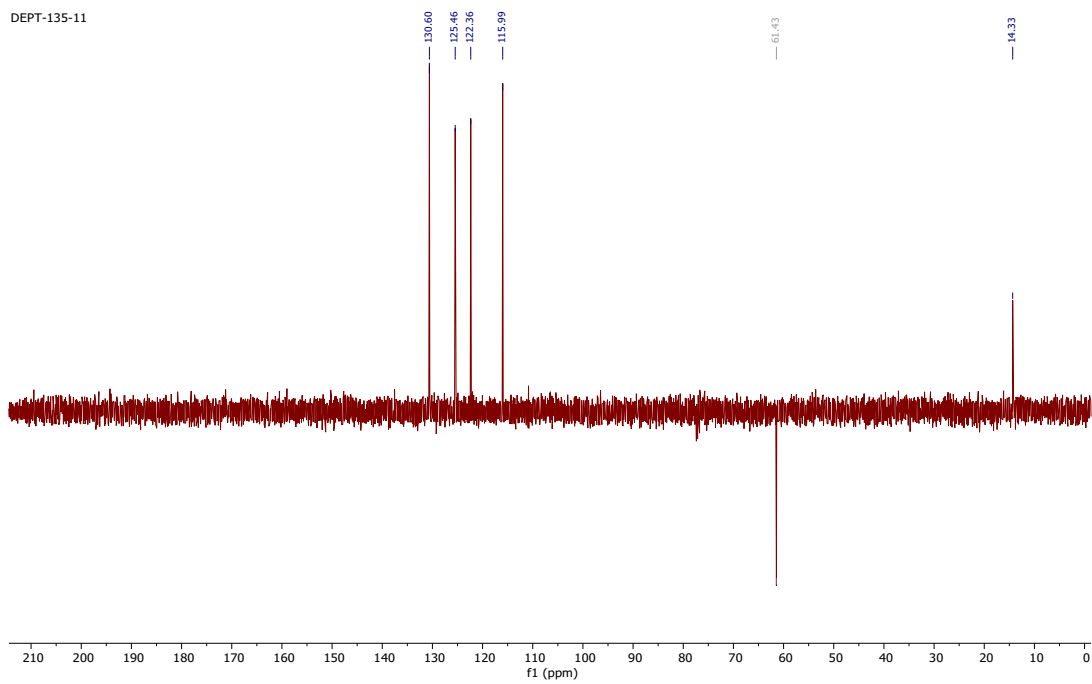

**Figure S20:** DEPT-135 (CDCl<sub>3</sub>, 101 MHz) spectrum of compound **11**.

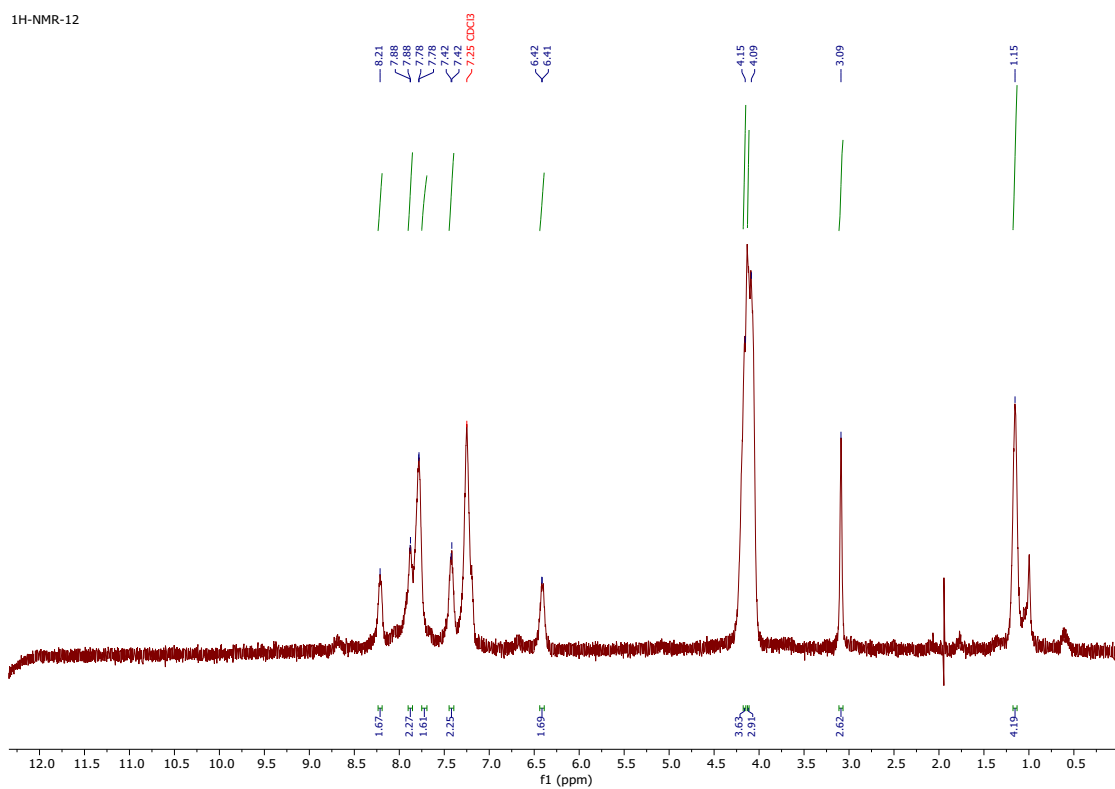

**Figure S21:** <sup>1</sup>H-NMR (CDCl<sub>3</sub>, 400 MHz) spectrum of compound **12**.

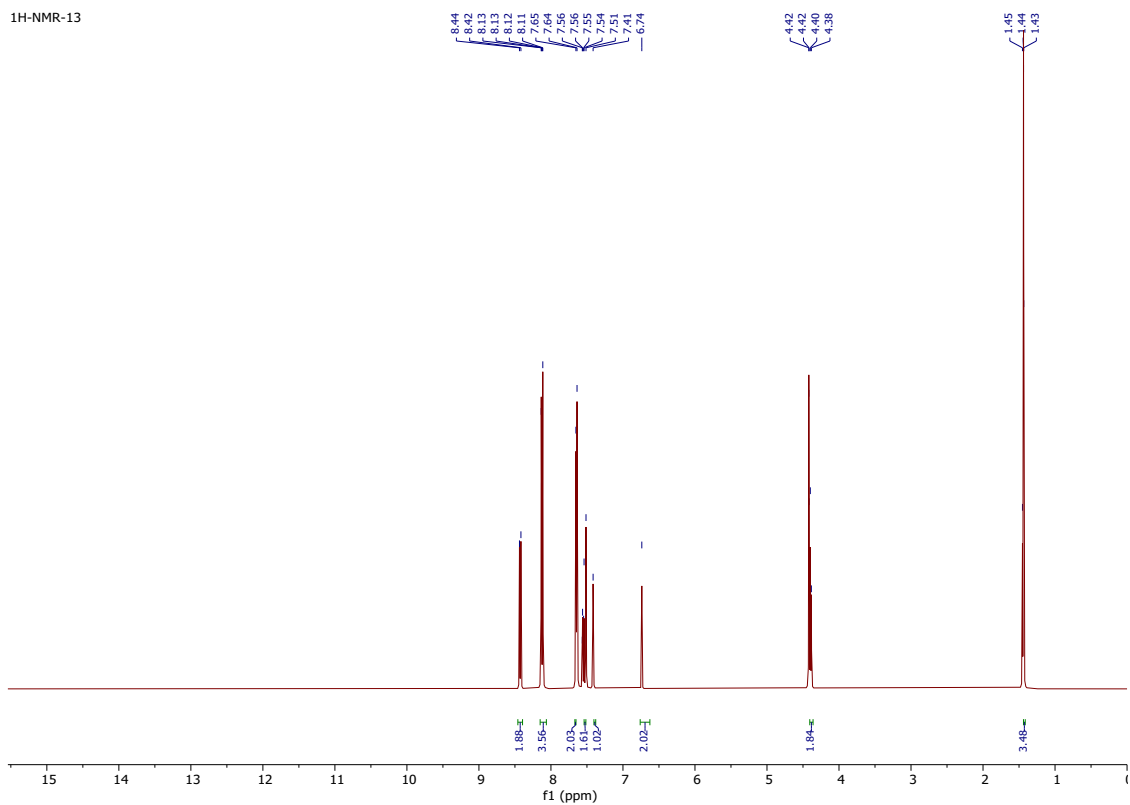

**Figure S22:**  $^1\text{H-NMR}$  ( $\text{CDCl}_3$ , 400 MHz) spectra of compound **13**.

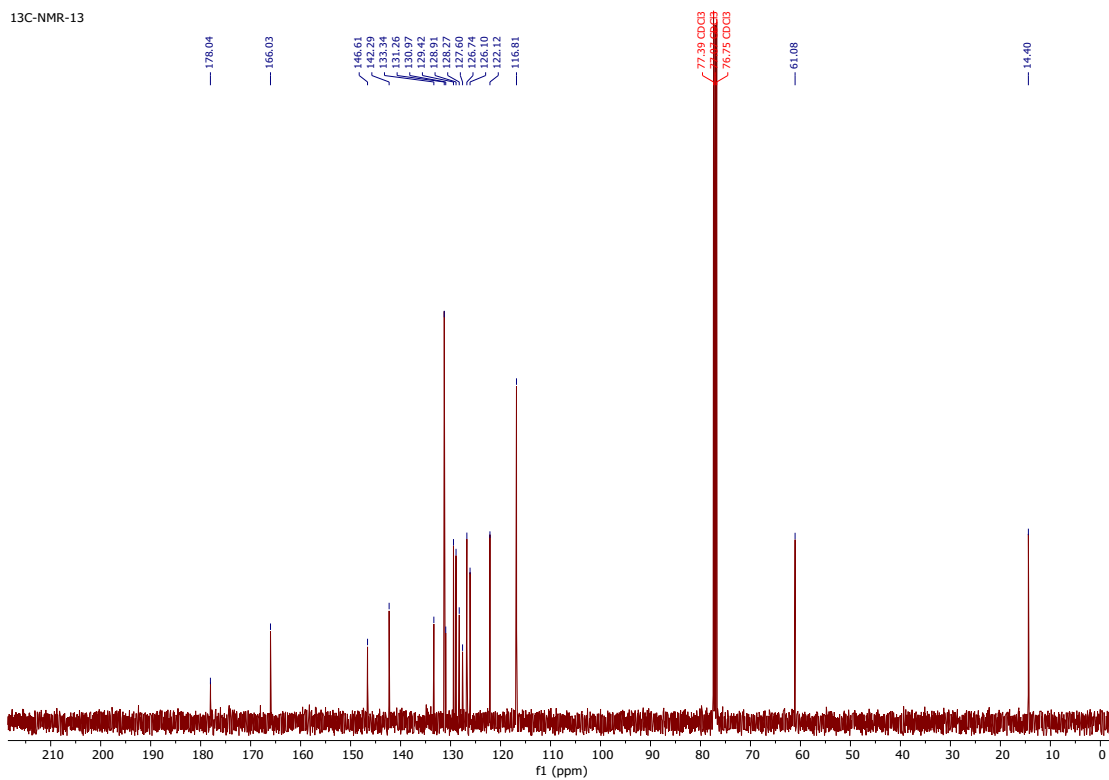

**Figure S23:**  $^{13}\text{C-NMR}$  ( $\text{CDCl}_3$ , 101 MHz) spectrum of compound **13**.

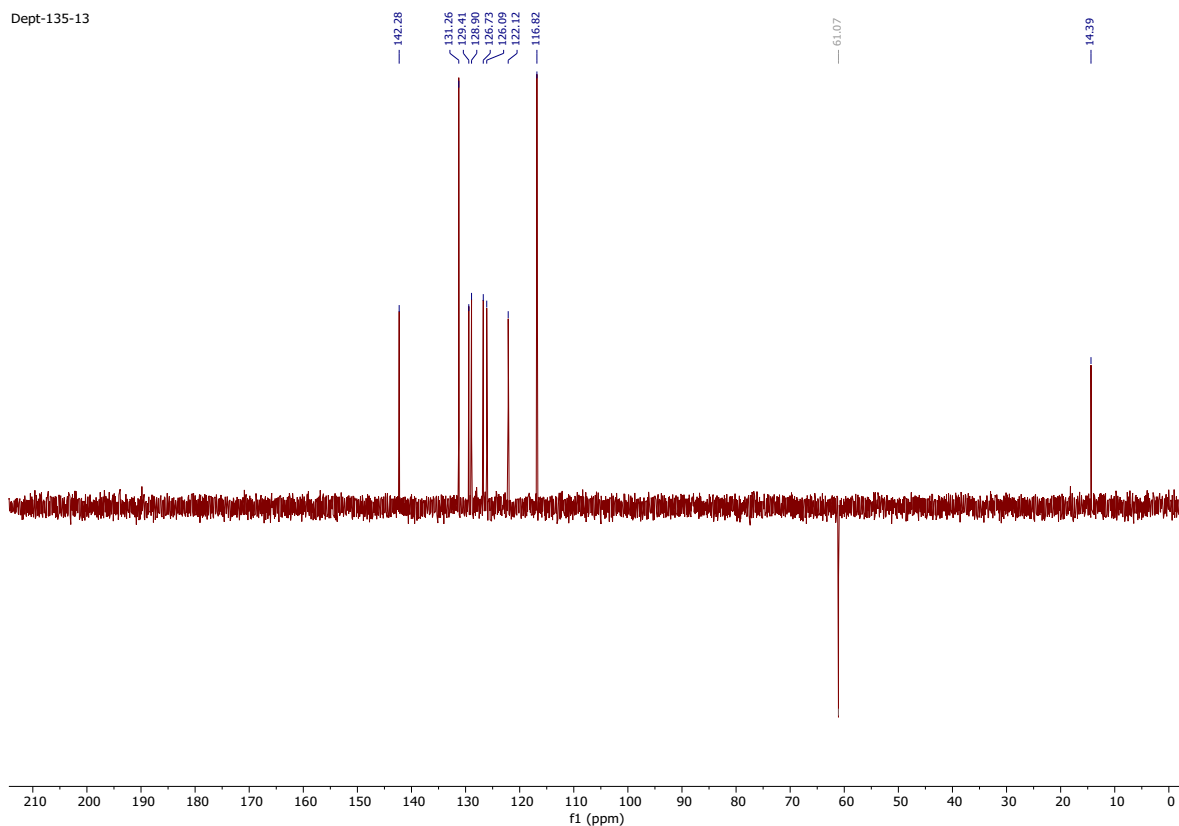

**Figure S24:** DEPT-135 (CDCl<sub>3</sub>, 101 MHz) spectrum of compounds **13**.

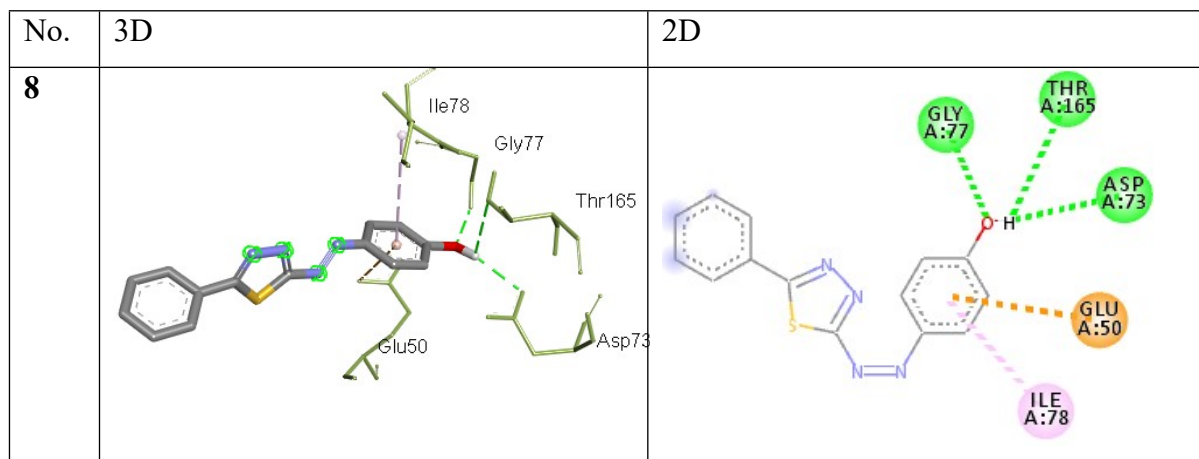

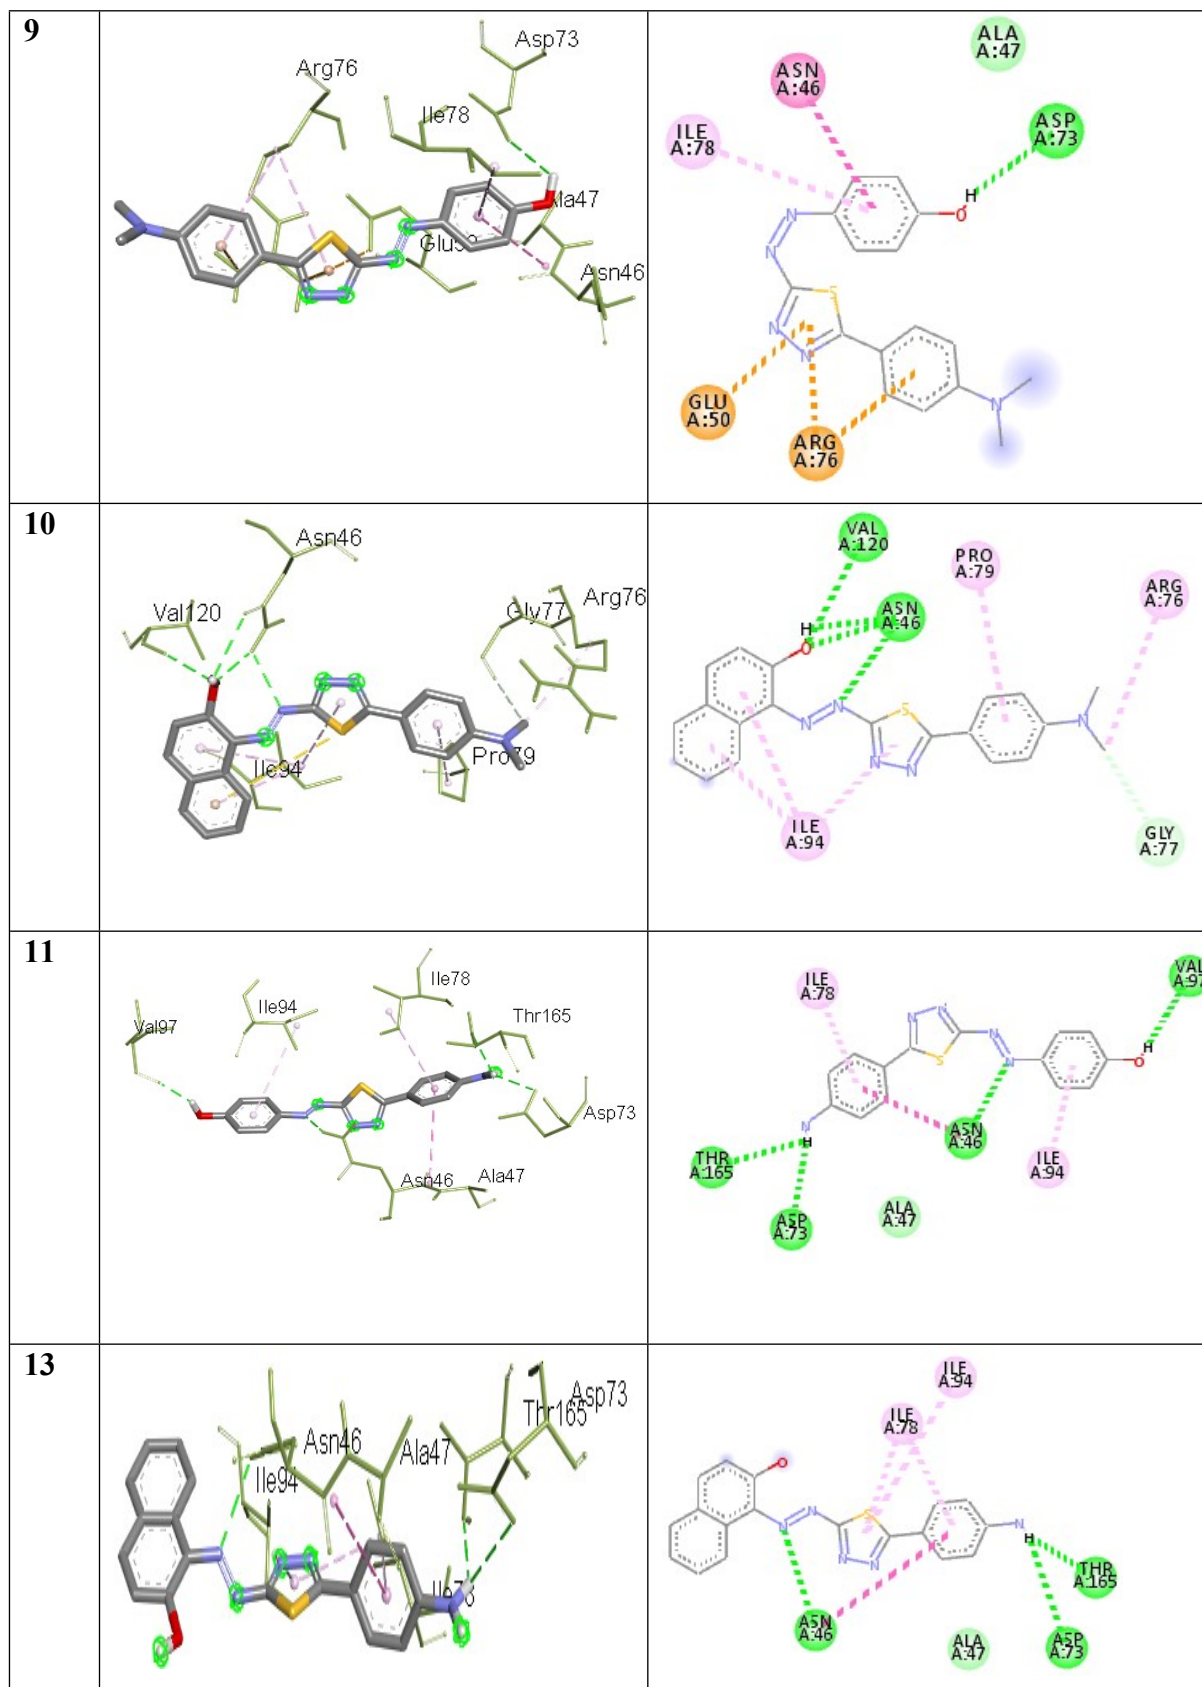

**Figure S25:** Binding interactions (3D & 2D) of the test compounds against *E. coli* DNA gyrase B.

| No. | 3D | 2D |
|-----|----|----|
| 8   |    |    |
| 9   |    |    |
| 11  |    |    |
| 12  |    |    |

**Figure S26:** Binding interactions (3D & 2D) of the test compounds against *S. aureus* PK

| No. | 3D | 2D |
|-----|----|----|
|     |    |    |

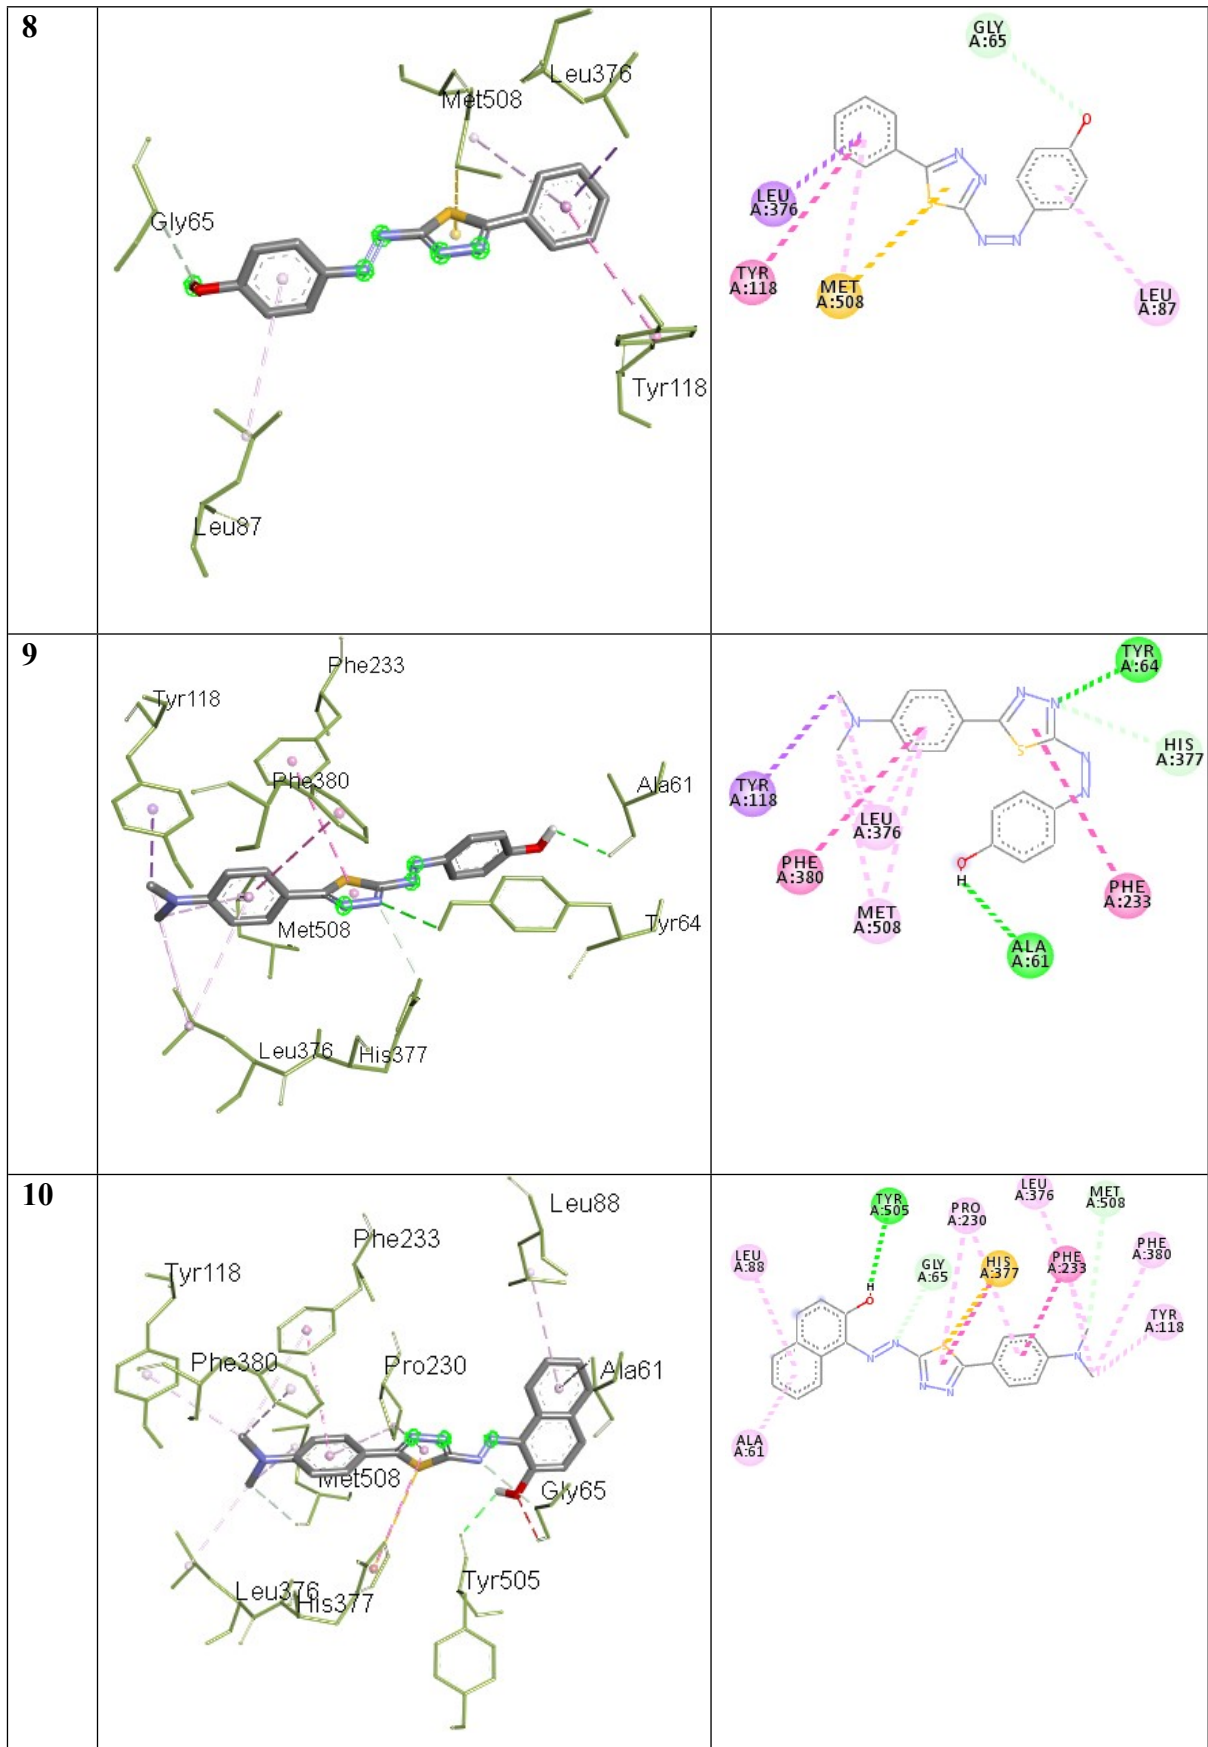



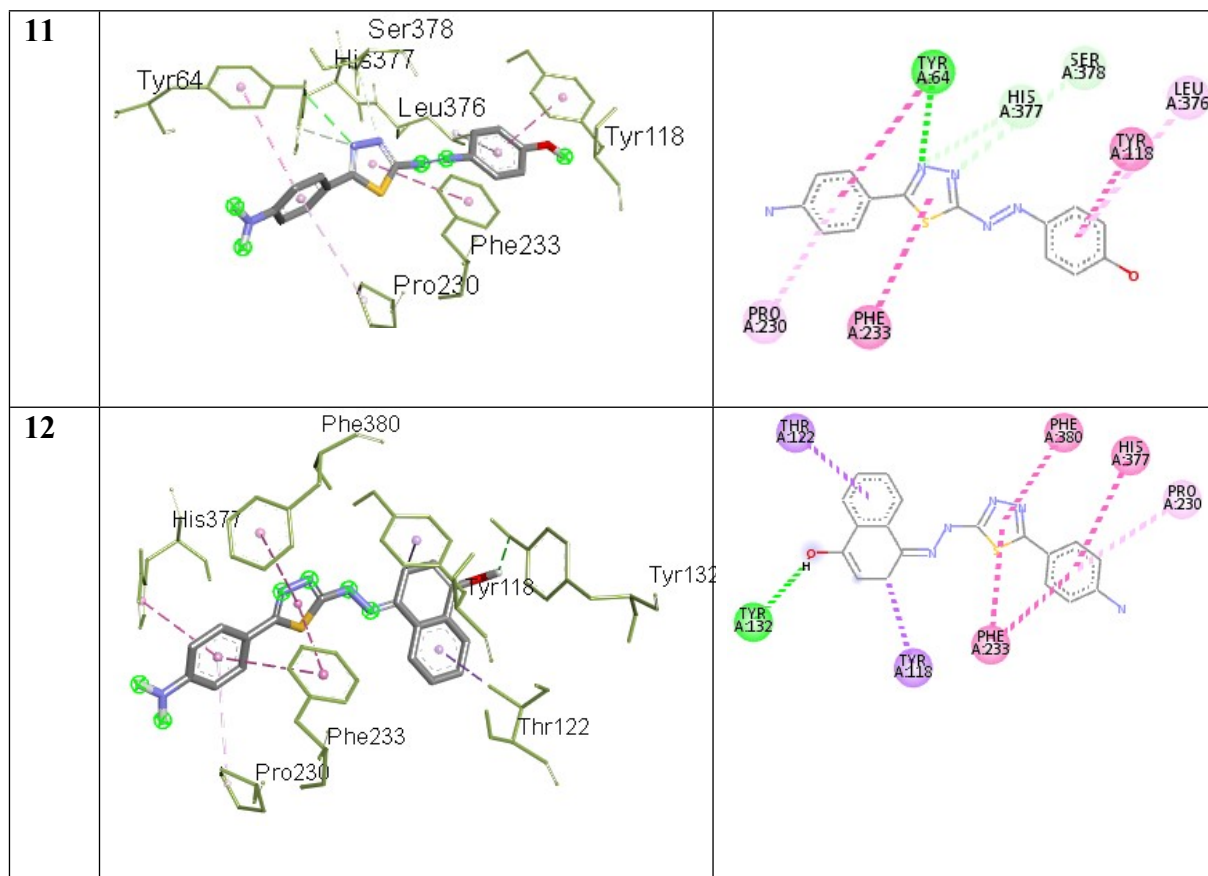

**Figure S27:** Binding interactions (3D & 2D) of the compounds (**8-13**) against *C. albicans* CYP51.

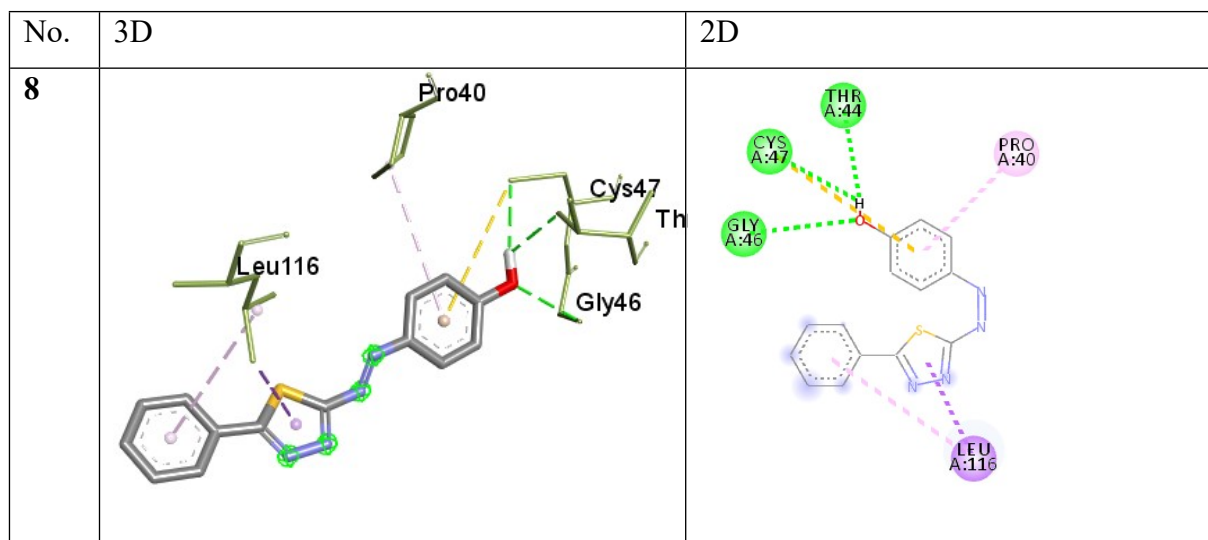

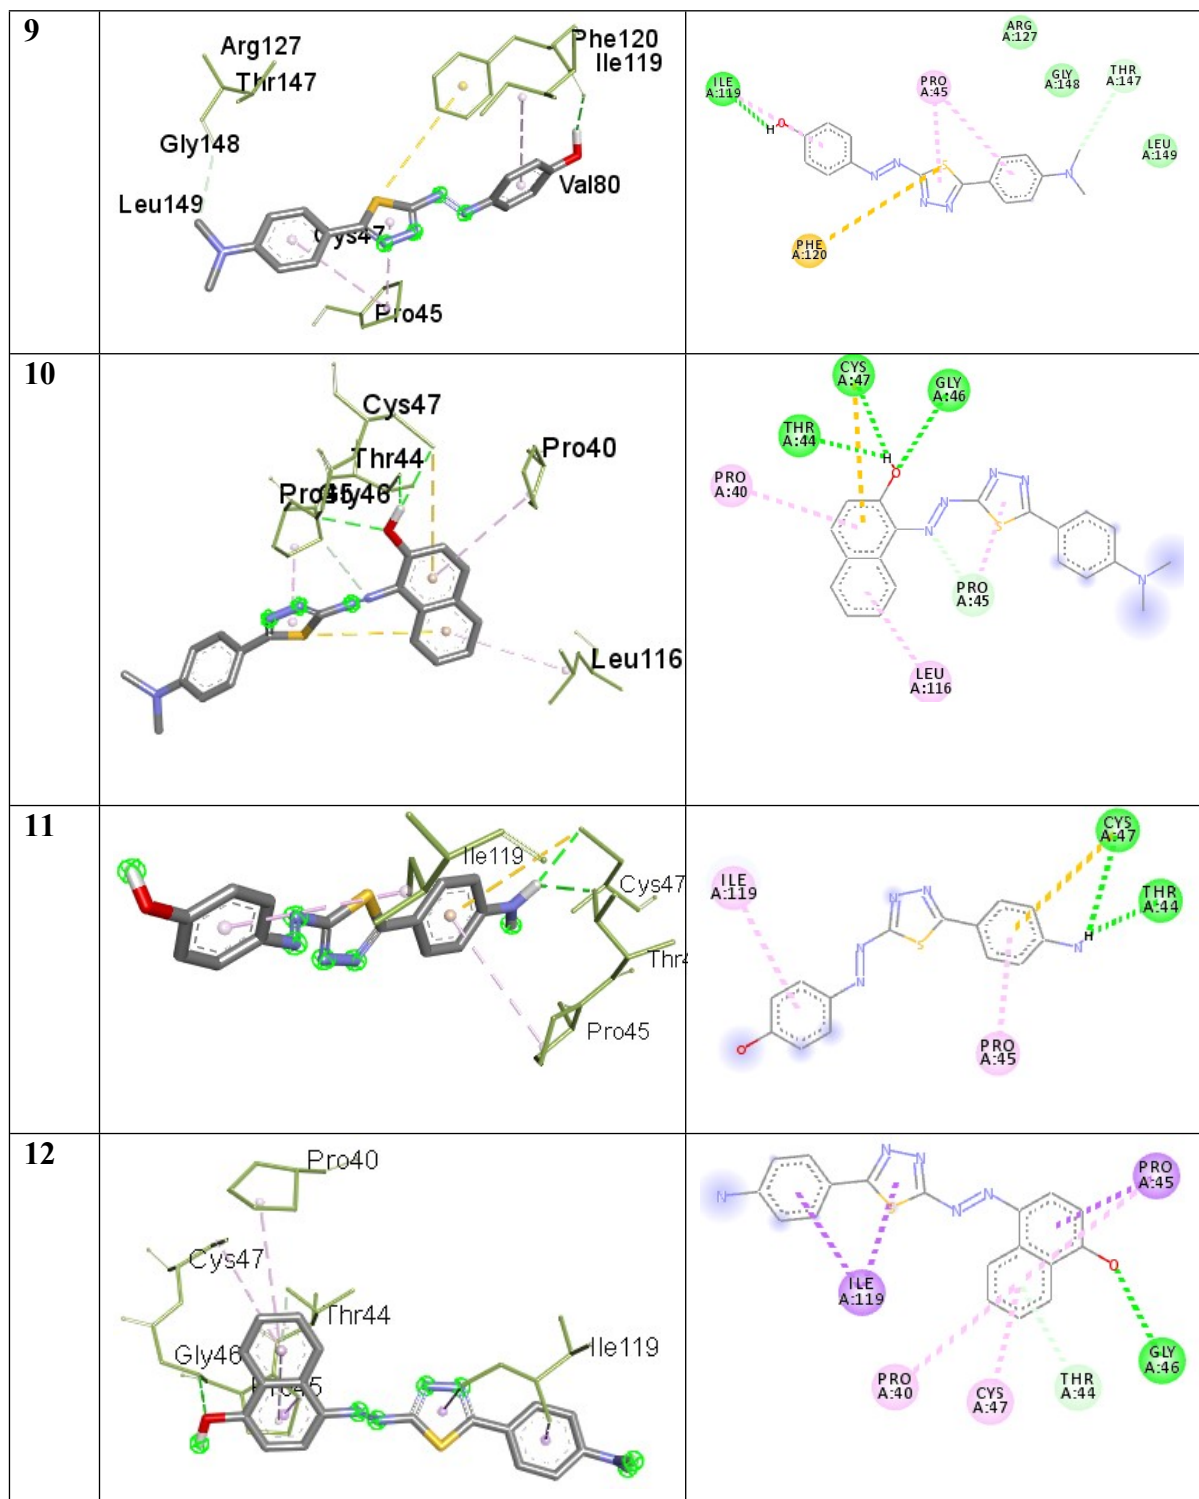

**Figure S28:** Binding interactions (3D & 2D) of the test compounds against human peroxidoxins 5
